# Supplementary material
Source: Elsevier journal article supplement (https://www.sciencedirect.com/science/article/pii/S0300893224003865)
Supplement: mmc1 [file mmc1.pdf]

## **MATERIAL ADICIONAL**

### **INVESTIGADORES DEL ESTUDIO REQXAA**

Hospital Clínico San Carlos, Madrid. David Vivas (Principal Investigador, PI), María Anguita-Gámez, Juan Carlos Gómez-Polo, Julia Playán, Amaya Calbet, Blanca Torres, Andrea Gallardo, Rocío Párraga, Inés Ramos, Manuel Carnero-Alcázar.

Hospital Universitari i Politècnic La Fe, Valencia. Raquel Ferrandis (PI), Marysol Echeverri, Jesús Igualada Sevilla, María Salomé Matoses Jaén, María Martí Monferrer, Juan Manuel Sanchís García, Azucena Pajares Moncho, María Isabel Molina Monleón, Jorge Tadeo Puchol Castillo, Virginia Vilar Bianchi, Rosa Bernabeu Santisteban, Rocío Cejudo Armero, María José Alberola Estelles, Elena Díaz Such, Natalia García Claudio.

Hospital Clínico Universitario Virgen de la Arrixaca, El Palmar, Murcia. Francisco Marín (PI), María Asunción Esteve-Pastor, José Miguel Rivera-Caravaca, Antonio Tello-Montoliu.

Hospital Universitario Infanta Leonor, Madrid. Beatriz Nozal-Mateo (co-PI), Ane Abad-Motos (co-PI), Ana Nieto-Moreno, Bárbara Algar-Yáñez, Berenice Gutiérrez-Tonal, Blanca Escontrela, María Laura Pelegrina-López, David Stolle-Dueñas, Elena Lucena de Pablo, Elena Nieto-Moreno, Eugenio Martínez-Hurtado, Javier Ripollés-Melchor, Marina de Retes-Sanz, Nerea Gómez-Pérez, Norma Aracil-Escoda, Olga de la Varga-Martínez, Rosa Sanz-González, Sandra Gadín-López, Sem Briongos (co-PI), Kateri Chao-Novo, Alfredo Abad-Gurumeta. Facultad de Odontología, Universidad Complutense, Madrid. Elena Figuero (PI), María González Zamora, Nagore Ambrosio, Ana Molina, David Herrera, Mariano Sanz.

Facultad de Odontología, Universidad Rey Juan Carlos, Madrid. Rafael Gómez de Diego, María González-Zamora.

Hospital Universitario Reina Sofía, Córdoba. Manuel Anguita (PI), Paula Anguita-Gámez.

Hospital Universitario 12 Octubre, Madrid. Nuria Bouzó (PI), Rosana Sanz-Peñuelas, Álvaro Ramiro-Ruiz, Susana Reca-González, Rocío Gómez-Margarida, Sara Arlanzón de Quevedo, María Guerrero-Díez, Raquel Jiménez-García, Rafael Arboleda-Salazar, Pablo García-Pimentel, Agar Cándida Carrero-Cabo.

Hospital Doctor Balmis, Alicante. Teresa Lozano (PI), Laura Fuertes-Kenneally, Ana María García Barrios, Andrea Lloret-Rubio, Carlos López-Menchero.

Hospital Universitario La Paz, Madrid. Carlos Álvarez (PI).

Hospital Universitario Jaén. Javier Torres (PI), María Eugenia Zambrano.

Hospital Costa del Sol, Marbella, Málaga. María José Descalzo-Pulido (PI), Azahara del Milagro Vázquez, Azahara Sáez-Muñoz, Nansi Vidal-Lorenzo.

Hospital General Universitario, Valencia. Juan Carlos Catalá (PI), Francisco Ridocci (PI), Marta Jimenez Fenellós.

Unidad de Gestión Clínica de Atención Primaria Poniente, Córdoba. Enrique Martín-Rioboo (PI), Emilio García-Criado, María Ángeles Ortega-Osuna, Julia María Hervás-Jerez.

Centro de Salud Isla de Oza, Madrid. Isabel Egocheaga (PI), Laura Utrilla, Yasmin Drak Hernández.

Centro de Salud Palma Norte, Madrid. Francisco Javier Torres-Martínez (PI).

Hospital Marina Baixa, Villajoyosa, Alicante. Alejandra Moliner-Cantó (PI), Gracia Barber-Ballester.

Hospital Torrecárdenas, Almería. Rocío Rodríguez-Contreras (IP), Regina Bernal-Basurto.

Hospital Universitario La Zarzuela, Madrid. Juan José Sánchez-Palomo (PI).
